# Supplementary material for: miR-153 suppresses IDO1 expression and enhances CAR T cell immunotherapy
Source: Springer Nature journal article supplement (doi:10.1186/s13045-018-0600-x), 2018-04-23
Supplement: MOESM1 [file 15714048]

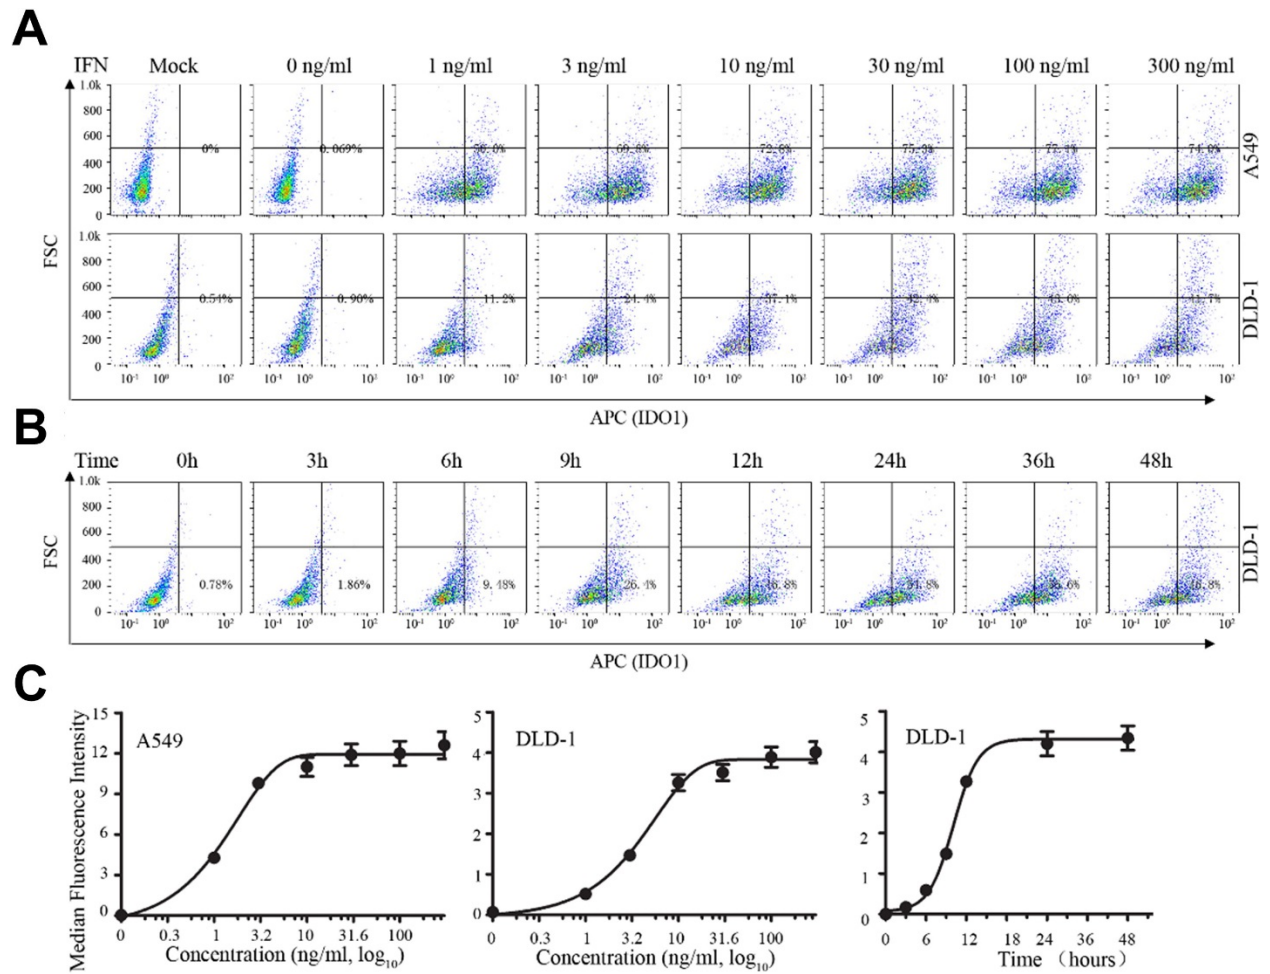

**Figure S1. IDO1 was induced by IFN- $\gamma$ .** (A) IDO1 expression of A549 and DLD-1 stimulated by 1-300 ng/ml IFN- $\gamma$  for 24 h. IDO1 expression was measured using flow cytometry. (B) IDO1 expression in DLD-1 cells treated with 30 ng/ml IFN- $\gamma$  for 3-48h. (C) IDO1 expression curves plotted from data in (A) and (B).
