# Supplementary material for: miR-153 suppresses IDO1 expression and enhances CAR T cell immunotherapy
Source: Springer Nature journal article supplement (doi:10.1186/s13045-018-0600-x), 2018-04-23
Supplement: MOESM4 [file 15714048]

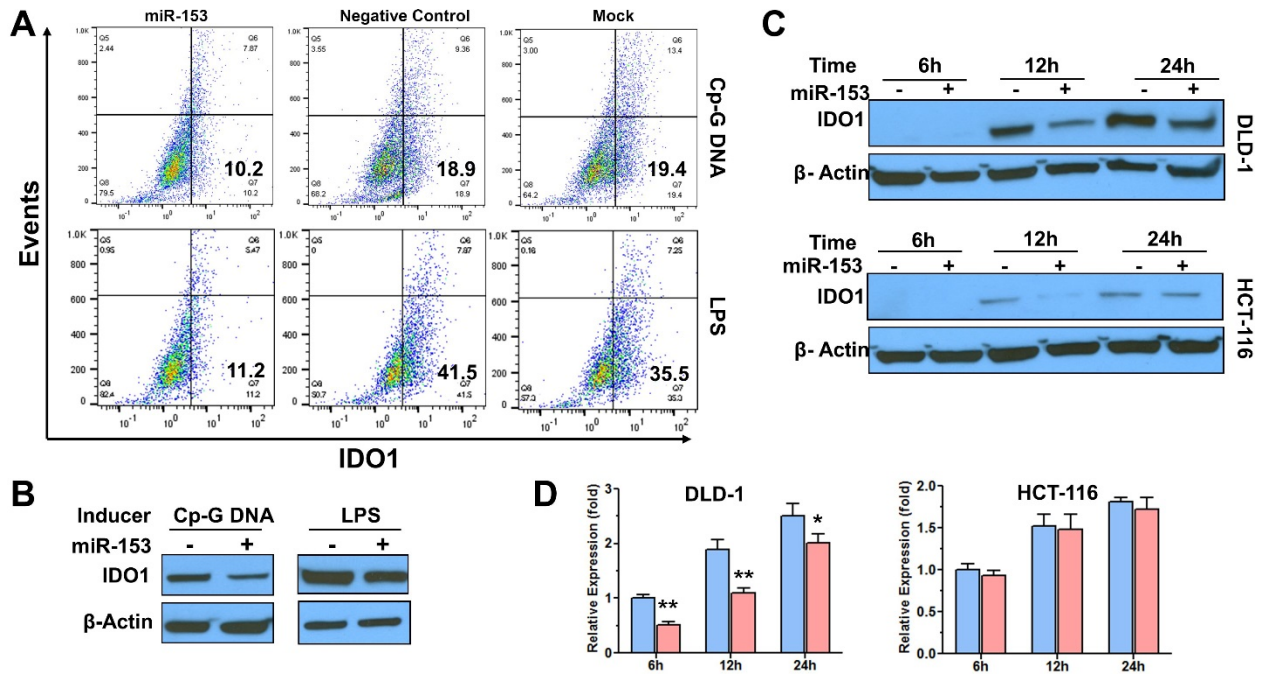

**Figure S4. IDO1 downregulation by miR-153 is inducer and time independent.** (A and B) IDO1 expression in DLD-1 cells treated by Cp-G DNA or LPS was down-regulated by miR-153 as measured by flow cytometry (A) or by western blotting (B). DLD-1 cells were treated with LPS or cp-G DNA for 12 h. (C and D) The IDO1 protein (C) or mRNA (D) levels in DLD-1 and HCT-116 cells transfected with or without miR-153 before treated with LPS for 6 to 24 h. \*,  $P \leq 0.05$ ; \*\*,  $P \leq 0.01$ .
