# Supplementary material for: miR-153 suppresses IDO1 expression and enhances CAR T cell immunotherapy
Source: Springer Nature journal article supplement (doi:10.1186/s13045-018-0600-x), 2018-04-23
Supplement: MOESM5 [file 15714048]

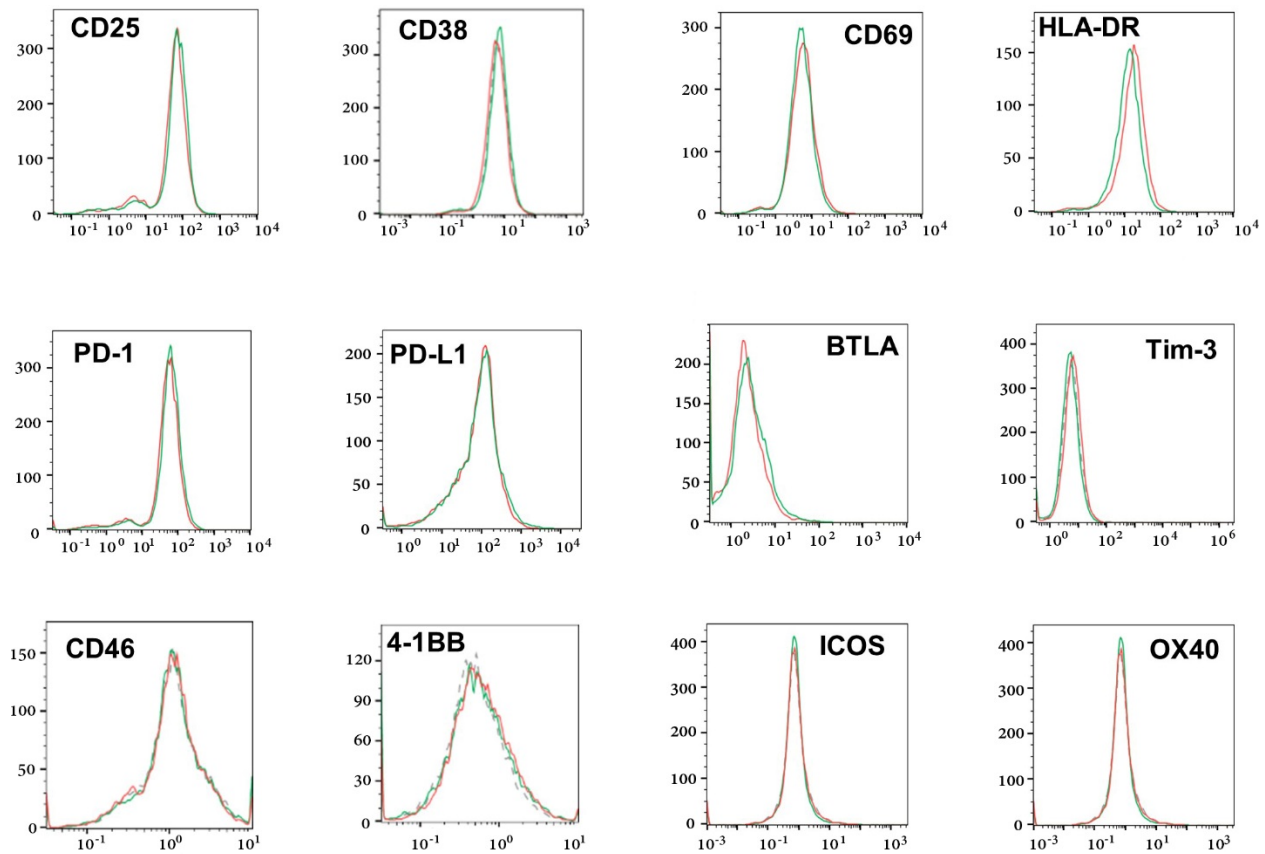

**Figure S5. The activation of T cells exhibits no difference when co-cultured with tumor cells with or without miR-153.** T cells were co-cultured in DLD-1+miR-153 (orange) or DLD-1+NC cells (green) for 24 hours. The expression of the designated T cell activation markers was measured by flow cytometry. Y axis denotes events (cell numbers); X axis denotes fluorescence density.
